# Supplementary material for: Aqueous colloidal CuInS2 for quantum dot sensitized solar cells
Source: Royal Society of Chemistry journal article supplement (doi:10.1039/c1jm12629f), 2011-01-01
Supplement: c1jm12629f.pdf [file c1jm12629f.pdf]

## Supporting Information

### Aqueous colloidal CuInS<sub>2</sub> for quantum dot sensitized solar cells

Xing Hu, Quanxin Zhang, Xiaoming Huang, Dongmei Li, Yanhong Luo and Qingbo Meng\*

\*Corresponding Author: E-mail: [qbmeng@iphy.ac.cn](mailto:qbmeng@iphy.ac.cn)

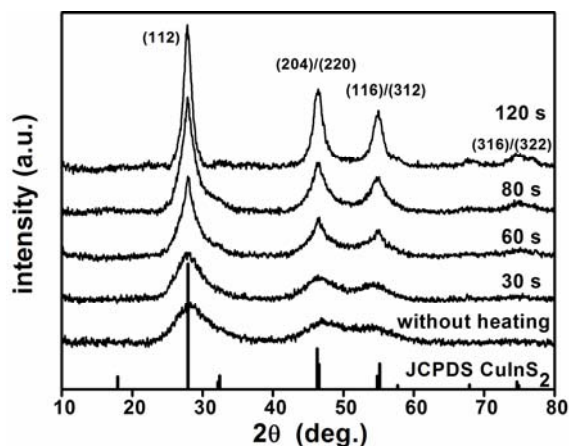

Fig. 1 XRD patterns of the CuInS<sub>2</sub> powder without and with 30 s, 60 s, 80 s and 120 s heating under 280 °C in air. The standard diffraction peak (JCPDS card File No 85-1517) is provided at the bottom of the figure.

The CuInS<sub>2</sub> colloid was precipitated by adding a large amount of acetone. CuInS<sub>2</sub> powder was obtained by centrifugation and washed with water and ethanol for several times. (Insufficient cleaning would cause NaCl impurity to remain in the powder). After drying in the vacuum oven, the CuInS<sub>2</sub> powder samples were heated at 280 °C in air for different time and then characterized by XRD. As shown in Fig. 1, to the CuInS<sub>2</sub> samples with and without heat treatment, their diffraction peaks round 27.8, 47 and 55° were detected, in good accordance with the standard patterns of chalcopyrite CuInS<sub>2</sub>. And as heating time increased, other CuInS<sub>2</sub> diffraction peaks of (316)/(332) appeared.

Furthermore, by using Debye-Scherrer equation, diameters of the CuInS<sub>2</sub> nanoparticles were estimated to be 2.2 nm for 0 s, 2.5 nm for 30 s, 3.5 nm for 60 s, 4.2 nm for 80 s and 7 nm for 120 s heating.
